# Supplementary material for: Facile Synthesis of Diatomite/β-Cyclodextrin Composite and Application for the Adsorption of Diphenolic Acid from Wastewater
Source: MDPI journal article supplement (doi:10.3390/ma15134588), 2022-06-29
Supplement: s1 [file s1]

## Supporting information

# Facile Synthesis of Diatomite/ $\beta$ -Cyclodextrin Composite and Application for the Adsorption of Diphenolic Acid from Wastewater

Min Hou <sup>1</sup>, Zhiyi Wang <sup>1</sup>, Qian Yu <sup>1</sup>, Xianming Kong <sup>1,\*</sup> and Miao Zhang <sup>2,\*</sup>

<sup>1</sup> School of Petrochemical Engineering, Liaoning Petrochemical University, Fushun, Liaoning 113001, China; hm189316@sina.com (M.H.); ww2474677557@sina.com (Z.W.); qyu@lnpu.edu.cn (Q.Y.)

<sup>2</sup> Department of Materials and Environmental Chemistry, Stockholm University, 10691 Stockholm, Sweden

\* Correspondence: xmkong@lnpu.edu.cn (X.K.); miao.zhang@mmk.su.se (M.Z.)

**Table S1. List of relevant abbreviations in the literature**

| Abbreviation    | Significance                               |
|-----------------|--------------------------------------------|
| DPA             | Diphenolic acid                            |
| DA              | Diatomite                                  |
| $\beta$ -CD     | $\beta$ -cyclodextrin                      |
| DA/ $\beta$ -CD | diatomite/ $\beta$ -cyclodextrin composite |
| Ts- $\beta$ -CD | P-toluenesulfonyl- $\beta$ -cyclodextrin   |
| EDCs            | Endocrine-disrupting compounds             |
| PI              | Phenol                                     |
| LA              | Levulinic acid                             |
| ECH             | Epichlorohydrin                            |
| PTSC            | P-toluene sulfonyl chloride                |

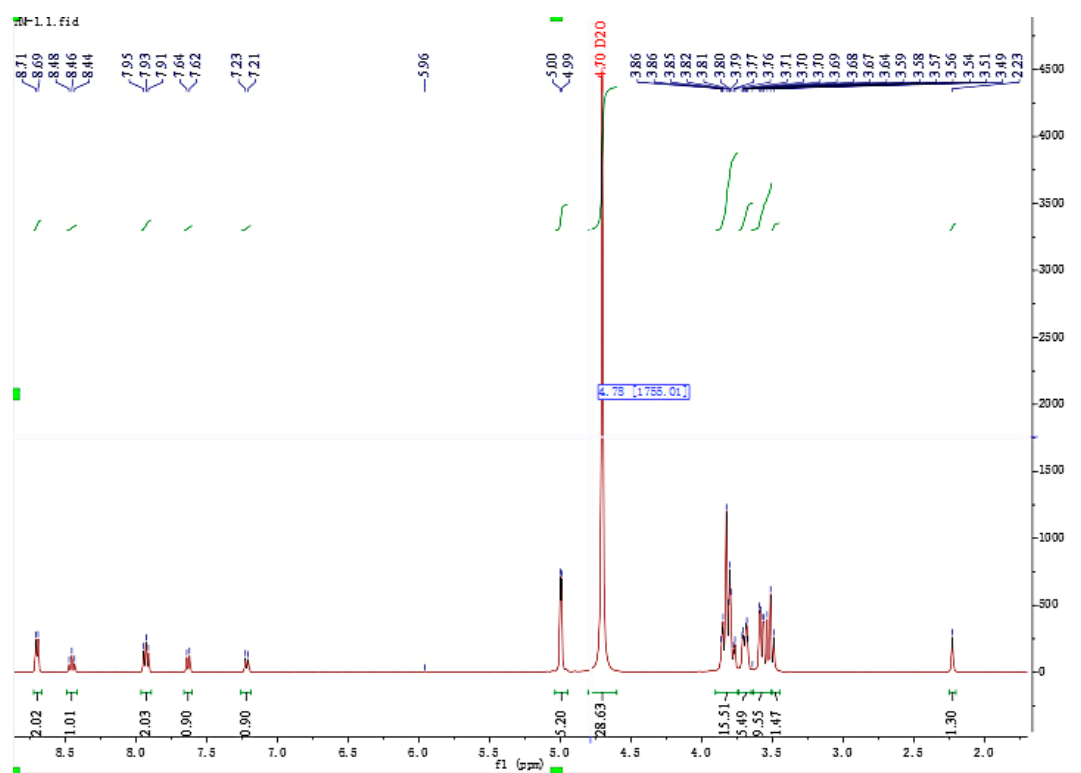

**Figure S1.**  $^1\text{H}$  NMR spectrum of Ts- $\beta$ -CD

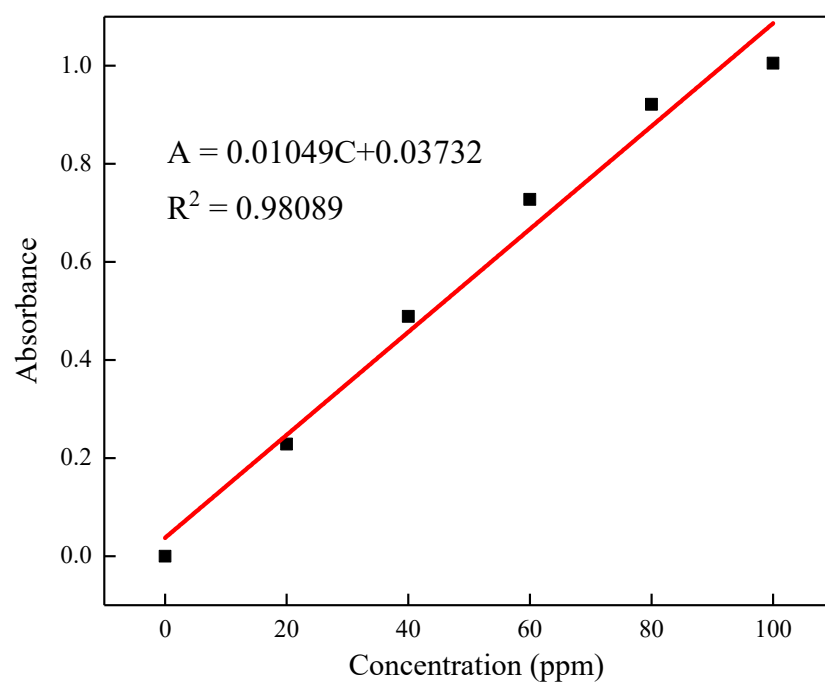

**Figure S2.** Standard curve of DPA

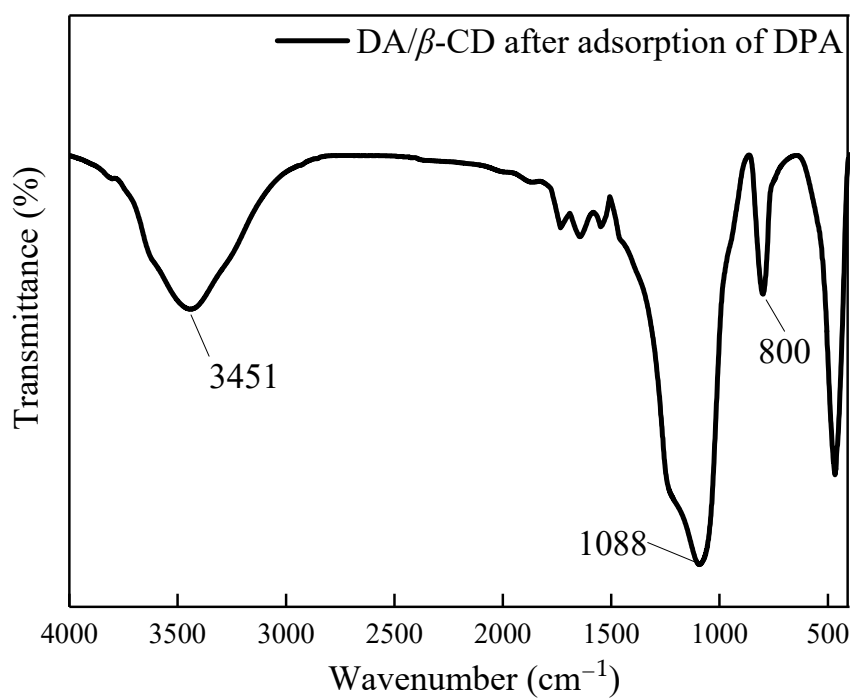

**Figure S3.** FT-IR spectra of DA/ $\beta$ -CD after adsorption of DPA

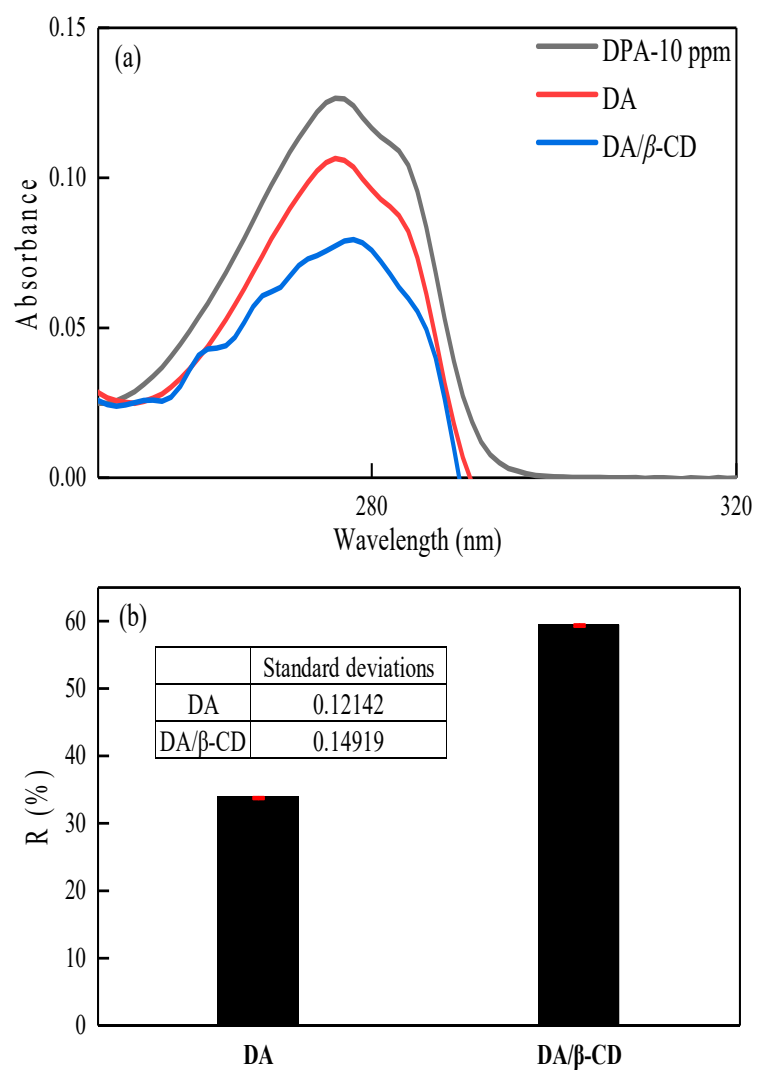

**Figure S4.** (a) UV-vis absorption spectrum of DPA after adsorbed by DA and DA/β-CD, (b) adsorption rates of DPA (10 ppm). 0.2 g adsorbent in 50 mL of DPA solution (10 ppm) at room temperature.

**Table S2. Comparison of Existing DPA Removal Methods**

| Methods                                | Features                                                                                                                                     | References |
|----------------------------------------|----------------------------------------------------------------------------------------------------------------------------------------------|------------|
| Photocatalysis                         | No pollution, but high catalyst cost                                                                                                         | [13–15]    |
| Ozone Oxidation                        | High cost and low O <sub>3</sub> utilization                                                                                                 | [16]       |
| Ferrate<br>Oxidation                   | Removal of bisphenol-based contaminants from aqueous solutions has limitations and may cause secondary pollution                             | [17]       |
| Fenton and<br>Fenton-like<br>oxidation | It can accelerate the degradation efficiency, but it is difficult to recycle and reuse, and the reaction conditions are difficult to control | [18,19]    |
| Adsorption                             | high efficiency, low energy consumption, simple process, and low cost, recyclable                                                            | [20–25]    |
